# Supplementary material
Source: publisher figshare collection journal article supplement (https://tandf.figshare.com/articles/dataset/_/12851240)
Supplement: Supplementary file 1 [file 1]

**Supplementary Table 2 Brain regions showing** **dynamic functional connectivity difference between the PTSD group and the HC group**

| Brain region | Voxel | Peak *t* score | MNI coordinates (x, y, z) |
| --- | --- | --- | --- |
| Left Middle Frontal Gyrus | 51 | -4.99 | -30,12,63 |
| Left Superior Frontal Gyrus | 12 | -3.73 | -27,24,57 |
| Right Middle Frontal Gyrus | 8 | -3.52 | 36,15,60 |
| Right Superior Frontal Gyrus | 3 | -4.12 | 36,15,63 |
| Right cerebellum | 20 | -4.70 | 18,-66,-21 |

PTSD, post-traumatic stress disorder; HC, healthy control; MNI, Montreal Neurological Institute; PreCG, precentral gyrus; PoCG, postcentral gyrus; MFG, middle frontal gyrus; PCC, posterior cingulate cortex; STG, superior temporal gyrus.
